# Supplementary material
Source: PubMed Central journal article supplement (PMC7783868)
Supplement: cs0c04290_si_001.pdf [file cs0c04290_si_001.pdf]

## Supporting Information

### Steering the Methane Dry Reforming Reactivity of Ni/La<sub>2</sub>O<sub>3</sub> Catalysts by Controlled *In Situ* Decomposition of doped La<sub>2</sub>NiO<sub>4</sub> Precursor Structures

Maged F. Bekheet,<sup>1</sup> Parastoo Delir Kheyrollahi Nezhad,<sup>2,3</sup> Nicolas Bonmassar<sup>3</sup>, Lukas Schlicker<sup>1</sup>, Albert Gili<sup>1</sup>, Sebastian Praetz,<sup>4</sup> Aleksander Gurlo<sup>1</sup>, Andrew Doran<sup>5</sup>, Yuanxu Gao<sup>6</sup>, Marc Heggen<sup>6</sup>, Aligholi Niaei,<sup>2</sup> Ali Farzi,<sup>2</sup> Sabine Schwarz,<sup>7</sup> Johannes Bernardi<sup>7</sup>, Bernhard Klötzer<sup>3</sup> and Simon Penner<sup>3,\*</sup>

<sup>1</sup>*Fachgebiet Keramische Werkstoffe/Chair of Advanced Ceramic Materials, Institut für Werkstoffwissenschaften und -technologien, Technische Universität Berlin, Hardenbergstr. 40, 10623 Berlin, Germany*

<sup>2</sup>*Reactor & Catalyst Research Lab, Department of Chemical Engineering, University of Tabriz, Tabriz, Iran*

<sup>3</sup>*Department of Physical Chemistry, University of Innsbruck, Innrain 52c, A-6020 Innsbruck, Austria*

<sup>4</sup>*Institute of Optics and Atomic Physics, Technische Universität Berlin, Hardenbergstraße 36, 10623 Berlin, Germany*

<sup>5</sup>*Advanced Light Source, Lawrence Berkeley National Laboratory Berkeley, California 94720, USA*

<sup>6</sup>*Ernst Ruska-Centrum für Mikroskopie und Spektroskopie mit Elektronen  
Forschungszentrum Jülich GmbH 52425 Jülich, Germany*

<sup>7</sup>*University Service Center for Transmission Electron Microscopy,  
TU Wien, Wiedner Hauptstrasse 8-10, A-1040 Vienna, Austria*

\*Corresponding Author: simon.penner@uibk.ac.at, Tel: 004351250758003, Fax: 004351250758199

### Section A: BET analysis

**Table S1:** BET surface area ( $\text{m}^2\text{g}^{-1}$ ) of the four catalysts before and after catalytic DRM at 800 °C for 90 min, obtained from 5 point measurements recorded at 77 K after degassing the samples under vacuum for 10 h at 200 °C.

| Sample                                                                   | Before DRM | After DRM |
|--------------------------------------------------------------------------|------------|-----------|
| $\text{La}_2\text{Ni}_{0.9}\text{Cu}_{0.1}\text{O}_4$                    | 3.252      | 4.241     |
| $\text{La}_2\text{Ni}_{0.8}\text{Cu}_{0.2}\text{O}_4$                    | 2.218      | 3.896     |
| $\text{La}_{1.8}\text{Ba}_{0.2}\text{Ni}_{0.9}\text{Cu}_{0.1}\text{O}_4$ | 3.695      | 4.748     |
| $\text{La}_{1.8}\text{Ba}_{0.2}\text{NiO}_4$                             | 4.549      | 3.021     |

**Section B: Electron microscopy analysis of  $\text{La}_{1.8}\text{Ba}_{0.2}\text{NiO}_4$  and  $\text{La}_{1.8}\text{Ba}_{0.2}\text{Ni}_{0.9}\text{Cu}_{0.1}\text{O}_4$  in the states before and after DRM at 800 °C.**

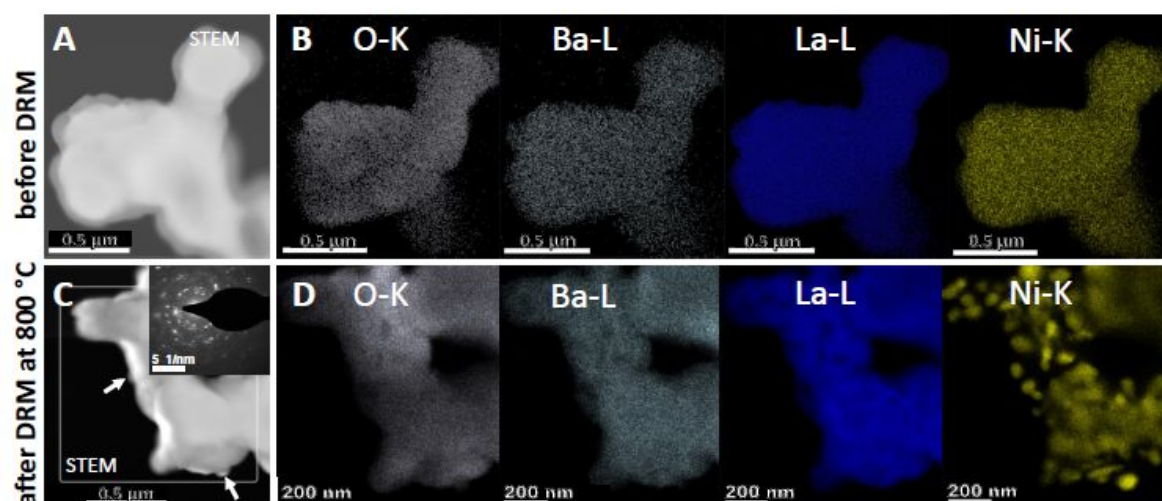

**Figure S1:** Electron microscopy analysis of  $\text{La}_{1.8}\text{Ba}_{0.2}\text{NiO}_4$  in the initial and DRM-spent state at 800 °C. Panels A and C: HAADF images, Panels B and D: EDX analysis of the O-K, Ba-L, La-L and Ni-K.

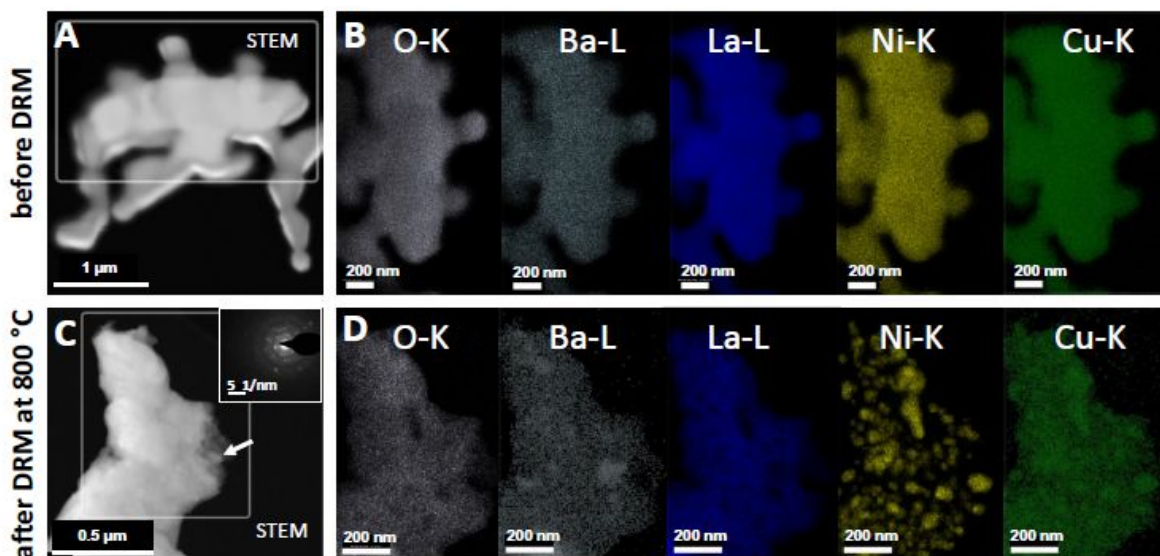

**Figure S2:** Electron microscopy analysis of  $\text{La}_{1.8}\text{Ba}_{0.2}\text{Ni}_{0.9}\text{Cu}_{0.1}\text{O}_4$  in the initial and DRM-spent state at 800 °C. Panels A and C: HAADF images, Panels B and D: EDX analysis of the O-K, Ba-L, La-L, Cu-K and Ni-K.

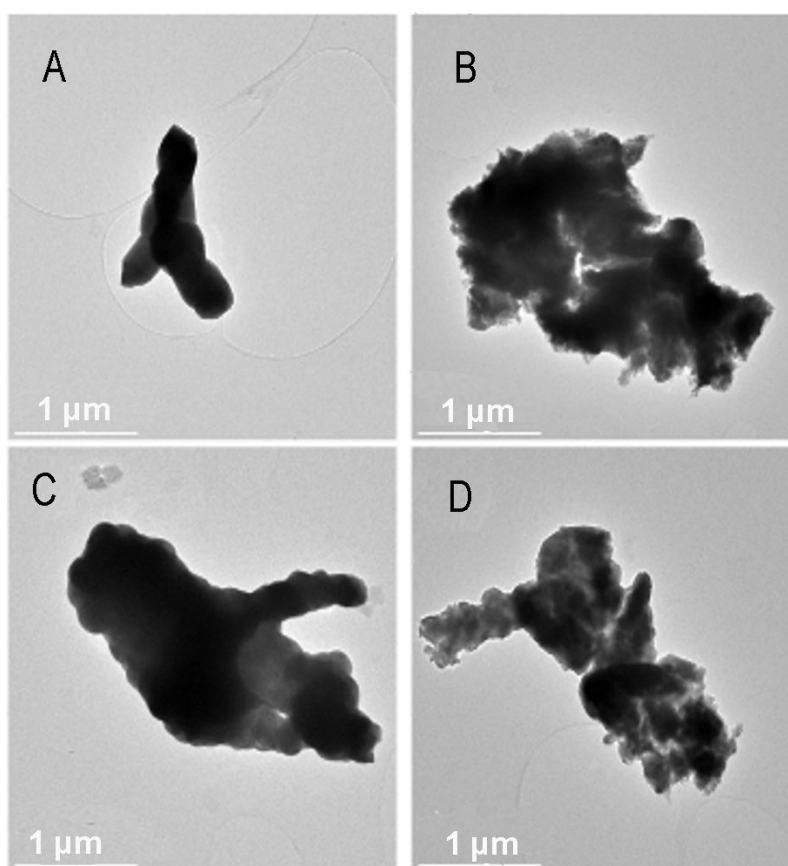

**Figure S3:** Transmission electron microscopy overview images of  $\text{La}_{1.8}\text{Ba}_{0.2}\text{NiO}_4$  and  $\text{La}_{1.8}\text{Ba}_{0.2}\text{Ni}_{0.9}\text{Cu}_{0.1}\text{O}_4$  in the initial (Panels A and C, respectively) and the DRM-spent state (Panels B and D, respectively).

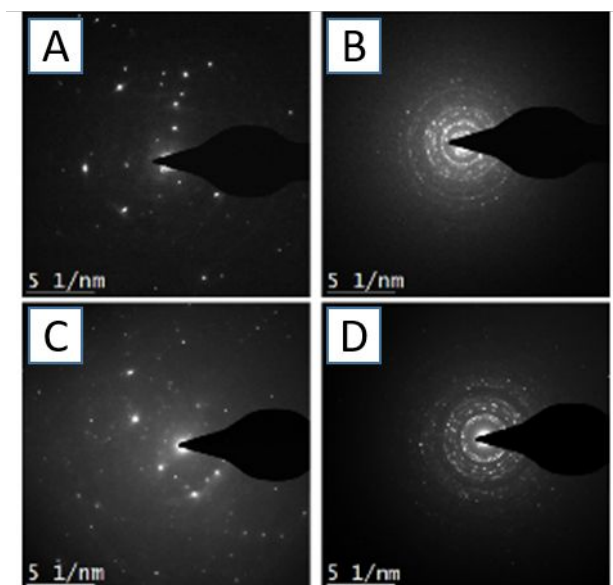

**Figure S4:** Selected area electron diffraction patterns of  $\text{La}_{1.8}\text{Ba}_{0.2}\text{NiO}_4$  and  $\text{La}_{1.8}\text{Ba}_{0.2}\text{Ni}_{0.9}\text{Cu}_{0.1}\text{O}_4$  in the initial (Panels A and C, respectively) and the DRM-spent state (Panels B and D, respectively).

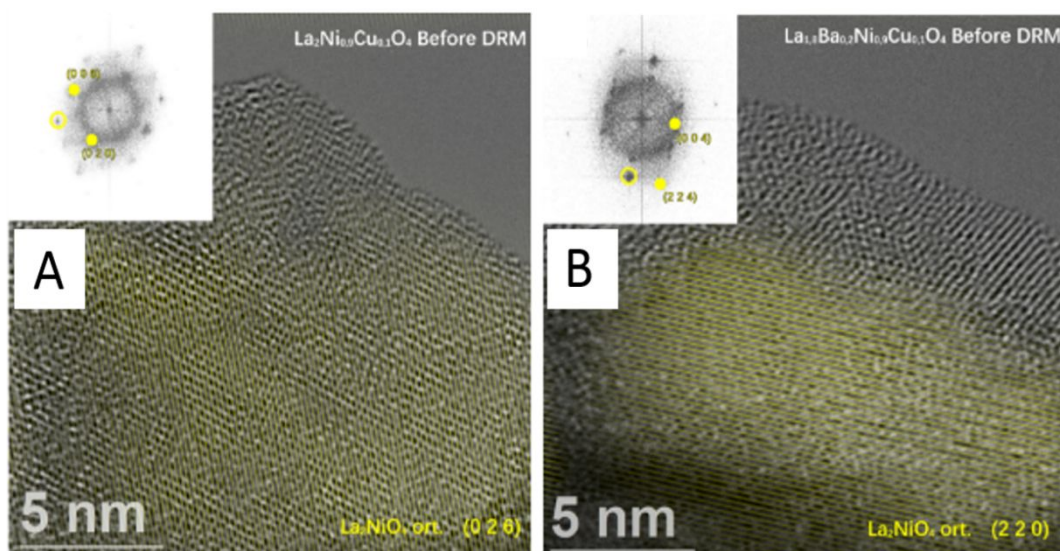

**Figure S5:** Aberration-corrected high-resolution electron microscopy images of  $\text{La}_2\text{Ni}_{0.9}\text{Cu}_{0.1}\text{O}_4$  (Panel A) and  $\text{La}_{1.8}\text{Ba}_{0.2}\text{Ni}_{0.9}\text{Cu}_{0.1}\text{O}_4$  (Panel B) in the initial state.

Representative lattice fringes of the orthorhombic  $\text{La}_2\text{NiO}_4$  structure have been Fourier-filtered and accordingly color-coded to highlight the presence of individual grains.

### Section C: Additional XRD analysis

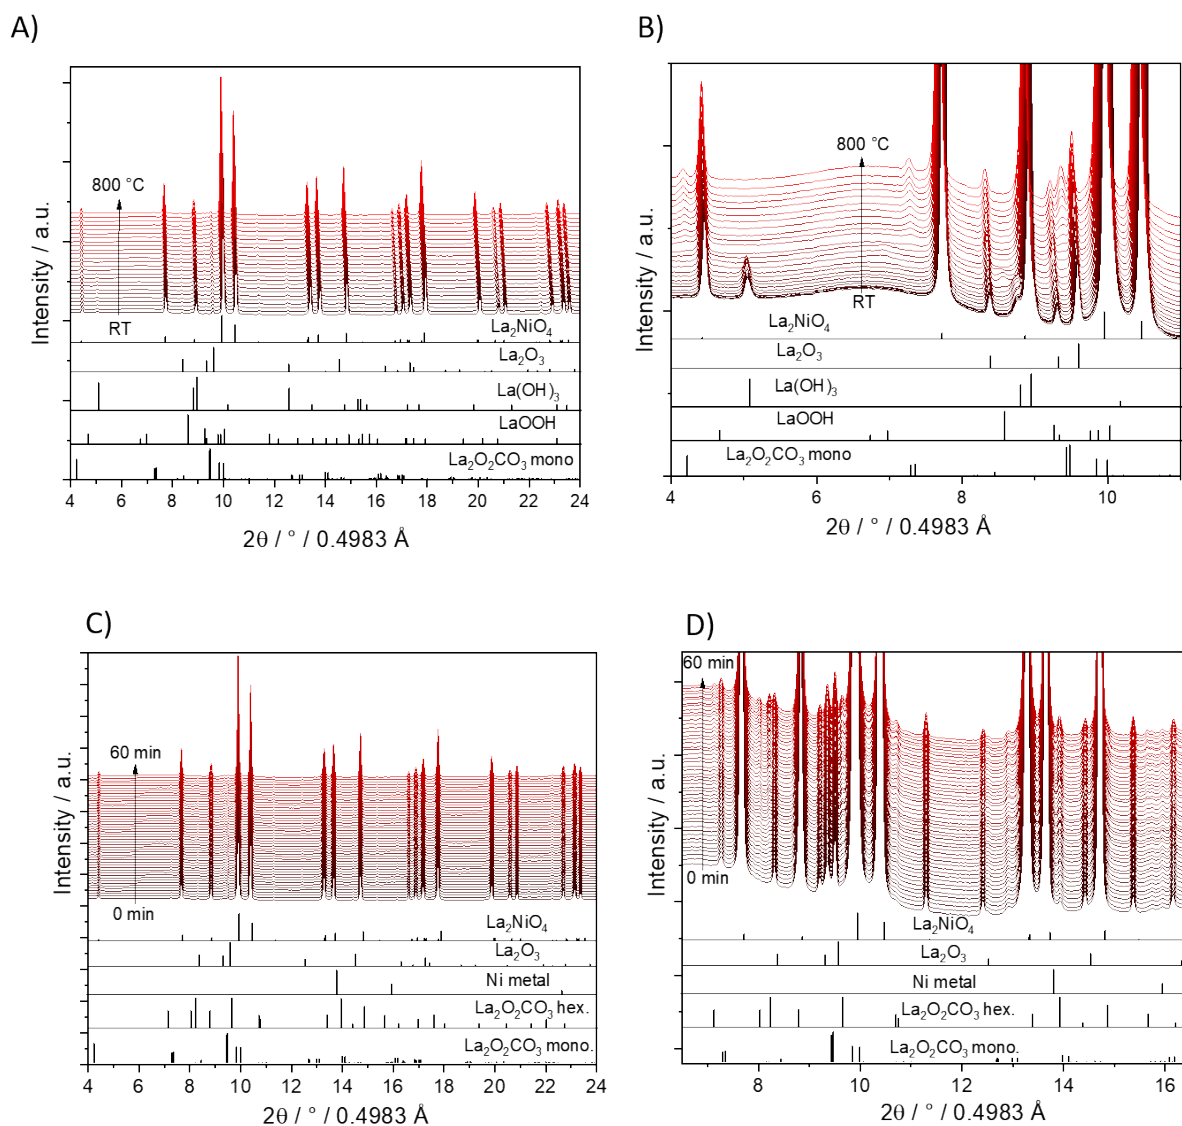

**Figure S6:** Panel A: *In situ* collected XRD patterns of  $\text{La}_{1.8}\text{Ba}_{0.2}\text{NiO}_4$  during heating up to 800 °C under DRM conditions. Panels B focus on a narrower  $2\theta$  window for closer analysis. The lower panel indicates the phase assignment to the respective reference structures. Panel C: *In situ* collected XRD patterns of  $\text{La}_{1.8}\text{Ba}_{0.2}\text{NiO}_4$  during holding at 800 °C for 60 min under DRM

conditions. Panels D focus on a narrower  $2\theta$  window for closer analysis. The lower panel indicates the phase assignment to the respective reference structures.

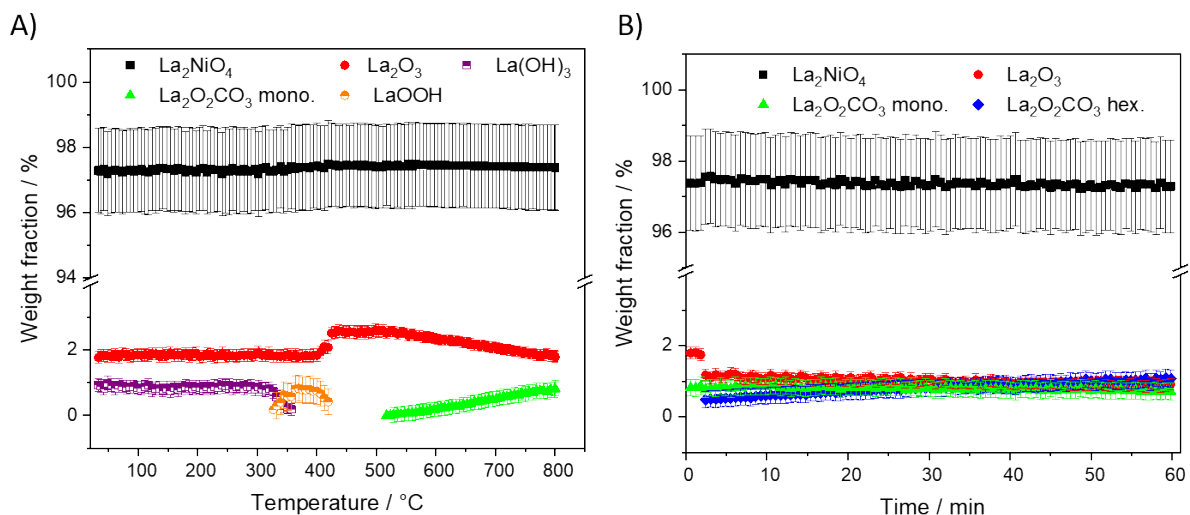

**Figure S7:** Weight fractions of different crystalline phases formed during DRM as a function of temperature (A) and time at 800 °C (B) obtained by Rietveld refinement of the *in situ* collected XRD patterns of  $\text{La}_{1.8}\text{Ba}_{0.2}\text{NiO}_4$ .

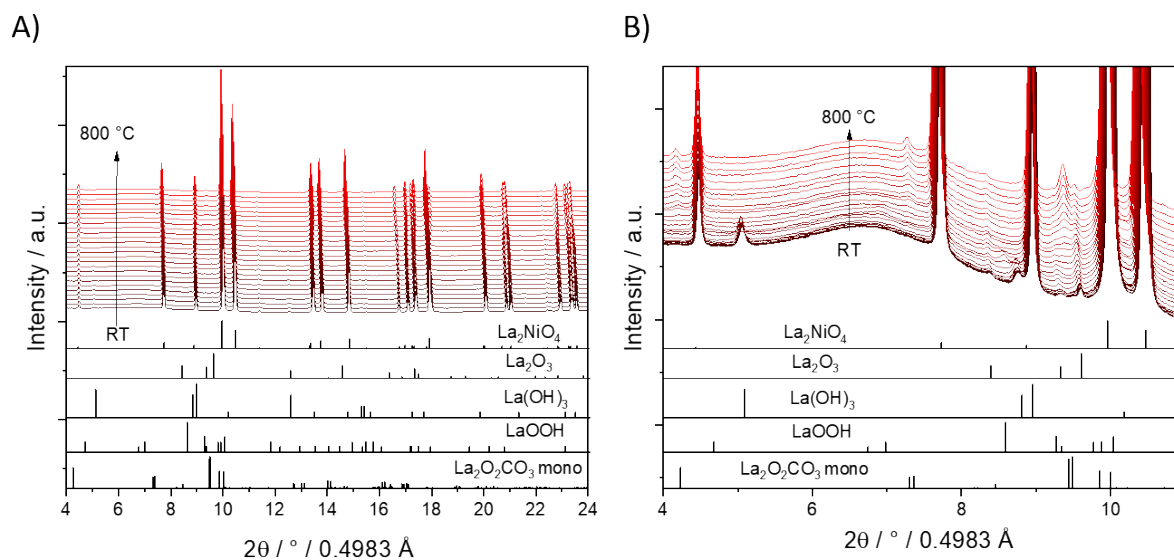

**Figure S8:** *In situ* collected XRD patterns of  $\text{La}_2\text{Ni}_{0.9}\text{Cu}_{0.1}\text{O}_4$  during heating up to 800 °C under DRM conditions. Panels B focus on a narrower  $2\theta$  window for closer analysis. The lower panel indicates the phase assignment to the respective reference structures.

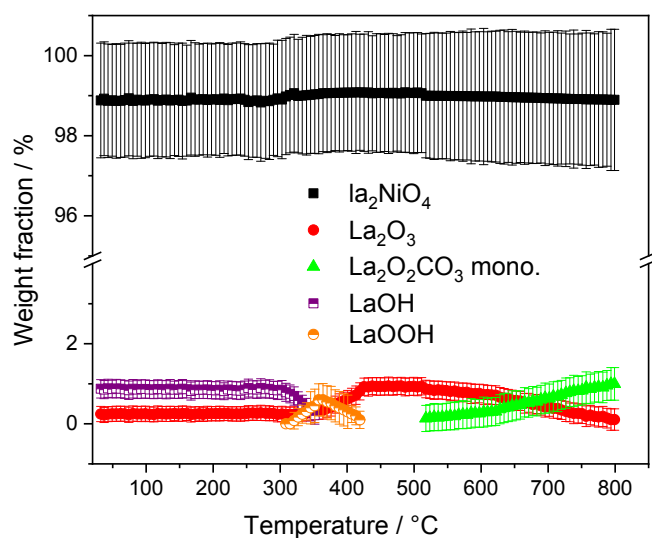

**Figure S9:** Weight fractions of different crystalline phases formed during DRM as a function of temperature obtained by Rietveld refinement of the in situ collected XRD patterns of  $\text{La}_2\text{Ni}_{0.9}\text{Cu}_{0.1}\text{O}_4$ .

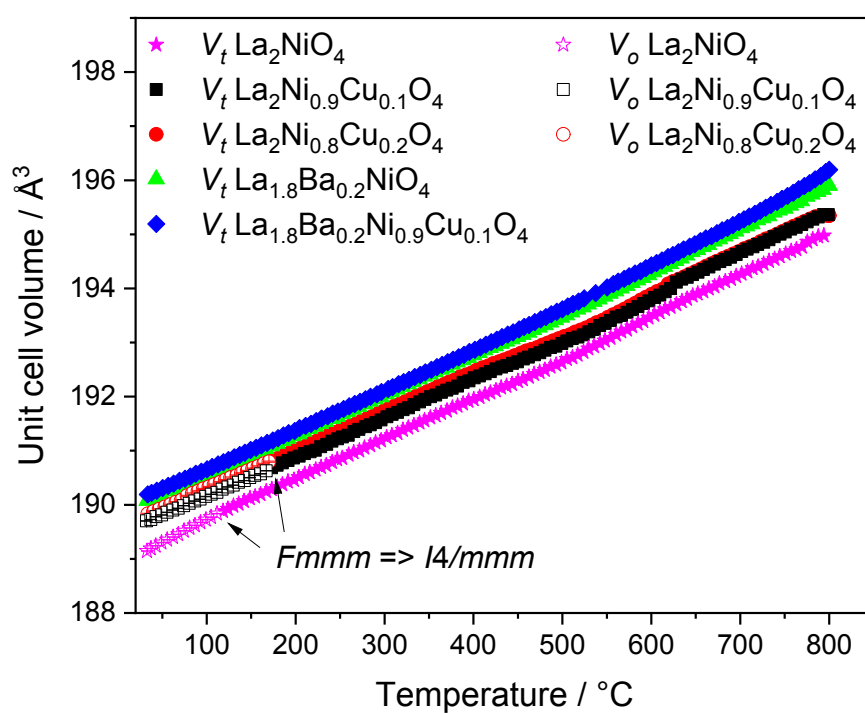

**Figure S10:** Evolution of the unit cell volume of pure and doped  $\text{La}_2\text{NiO}_4$  samples as a function of temperature in the DRM mixture.

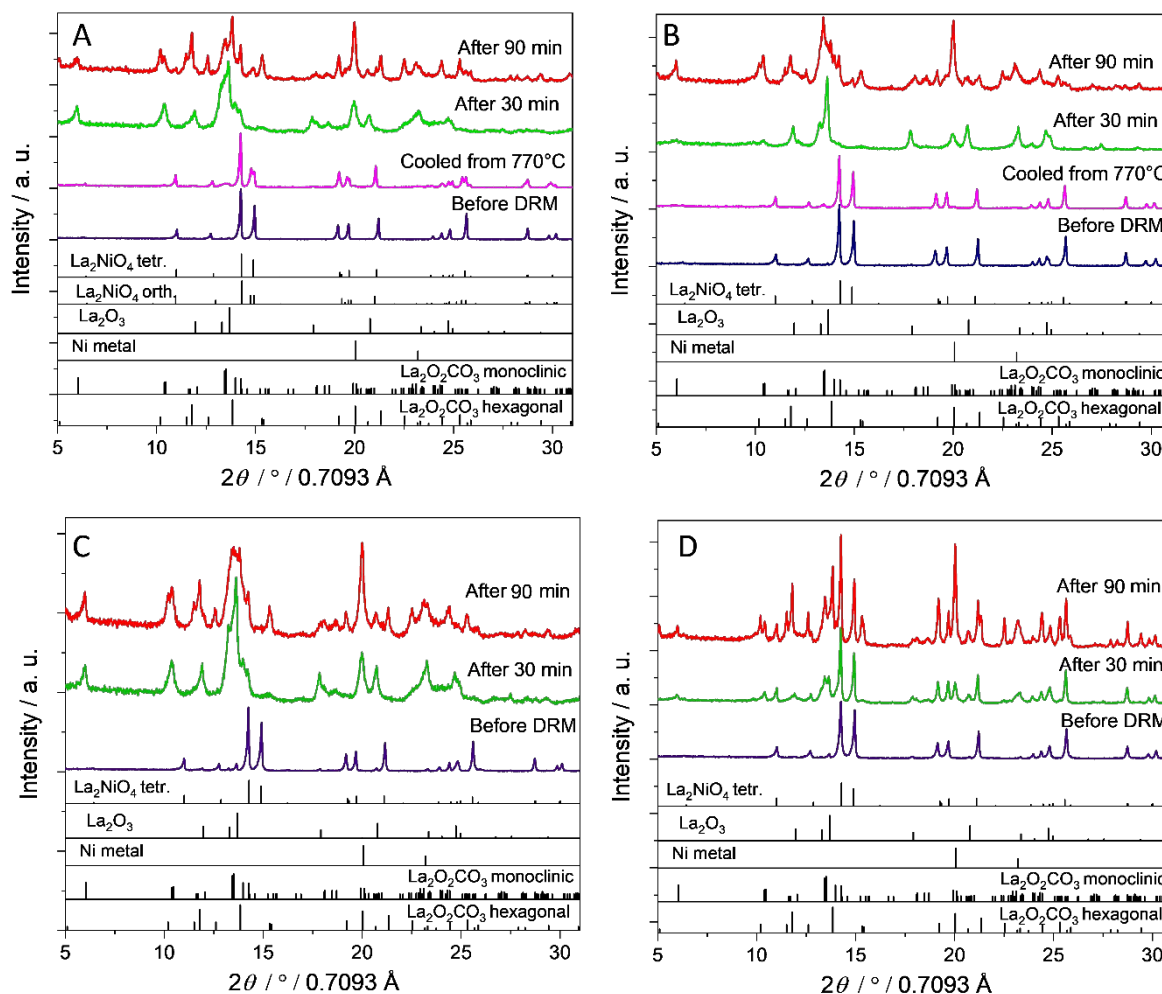

**Figure S11:** *Ex situ* collected PXRD patterns of La<sub>2</sub>Ni<sub>0.8</sub>Cu<sub>0.2</sub>O<sub>4</sub> (A), La<sub>1.8</sub>Ba<sub>0.2</sub>Ni<sub>0.9</sub>Cu<sub>0.1</sub>O<sub>4</sub> (B), La<sub>2</sub>Ni<sub>0.9</sub>Cu<sub>0.1</sub>O<sub>4</sub> (C), and La<sub>1.8</sub>Ba<sub>0.2</sub>NiO<sub>4</sub> (D) Ruddlesden-Popper materials before and after a catalytic DRM (CO<sub>2</sub>:CH<sub>4</sub>:He = 1:1:3) runs in a total gas flow of 100 mL min<sup>-1</sup> at different conditions.



## Section D: Additional XANES analysis

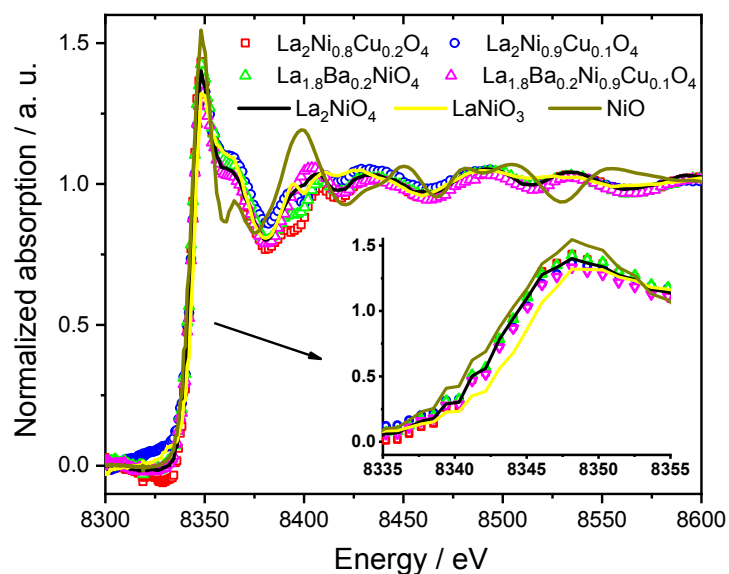

**Figure S12:** Normalized Ni K-edge X-ray absorption fine structure (XANES) of pure and doped  $\text{La}_2\text{NiO}_4$  Ruddlesden-Popper materials as well of reference materials ( $\text{NiO}$  and  $\text{LaNiO}_3$ ).

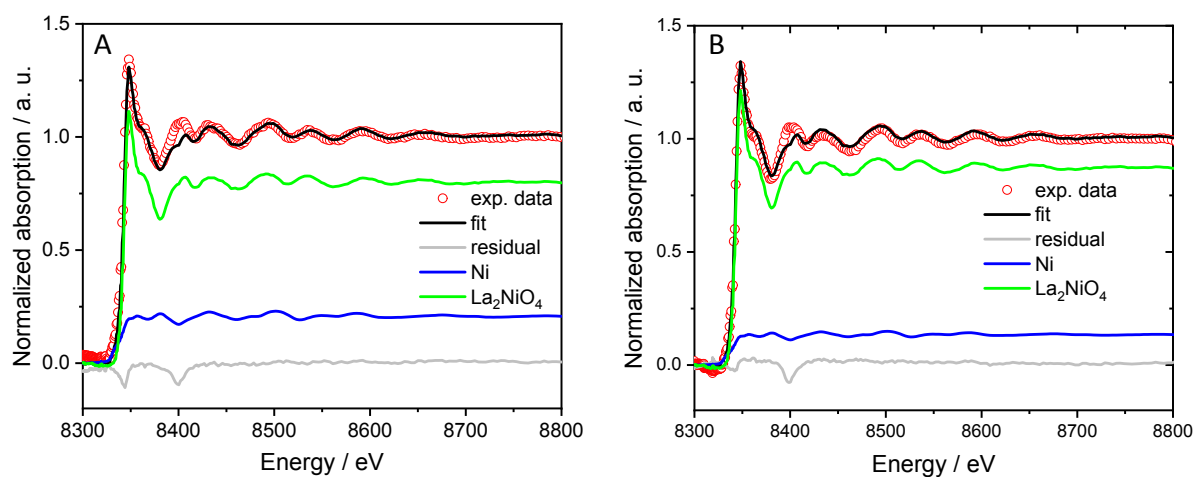

**Figure S13:** Linear combination fitting (LCF) of normalized Ni K-edge XANES spectra of  $\text{La}_2\text{Ni}_{0.8}\text{Cu}_{0.2}\text{O}_4$  and  $\text{La}_{1.8}\text{Ba}_{0.2}\text{Ni}_{0.9}\text{Cu}_{0.1}\text{O}_4$  with those of reference materials ( $\text{NiO}$  and  $\text{La}_2\text{NiO}_4$ ).

## Section E: XPS analysis

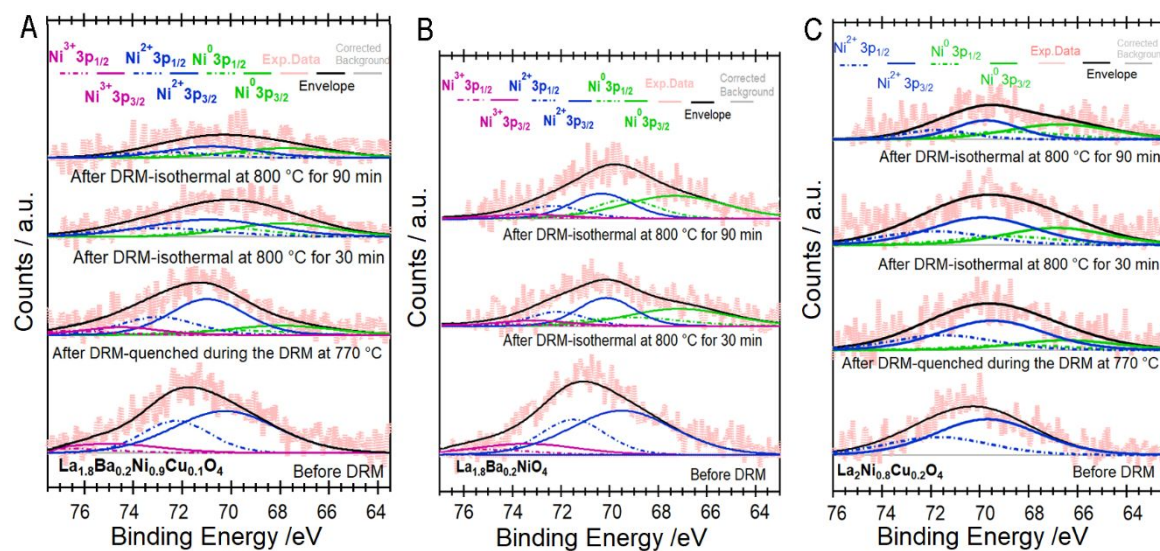

**Figure S14:** Full set of Ni 3p species of  $\text{La}_{1.8}\text{Ba}_{0.2}\text{Ni}_{0.9}\text{Cu}_{0.1}\text{O}_4$  (Panel A),  $\text{La}_{1.8}\text{Ba}_{0.2}\text{NiO}_4$  (Panel B) and  $\text{La}_2\text{Ni}_{0.8}\text{Cu}_{0.2}\text{O}_4$  (Panel C) after selected DRM treatments.
